# Supplementary material for: Bark and Grape Microbiome of Vitis vinifera: Influence of Geographic Patterns and Agronomic Management on Bacterial Diversity
Source: PubMed Central journal article supplement (PMC6331396; doi:10.3389/fmicb.2018.03203), 2019-01-08

## *Supplementary Material*

### **Bark and grape microbiome of *Vitis vinifera*: influence of geographic patterns and agronomic management on bacterial diversity**

**Nicola Vitulo<sup>1</sup>, Wilson José Fernandes Lemos Junior<sup>1</sup>, Matteo Calgaro<sup>1</sup>, Marco Confalone<sup>1</sup>,  
Giovanna E. Felis<sup>1</sup>, Giacomo Zapparoli<sup>1</sup>, Tiziana Nardi<sup>2\*</sup>**

<sup>1</sup> Department of Biotechnology, University of Verona, Verona, Italy

<sup>2</sup> Research Centre for Viticulture and Enology, Council for Agricultural Research and Economics (CREA), Conegliano, Italy

**\*Correspondence:**

Tiziana Nardi;

e-mail: [tiziana.nardi@crea.gov.it](mailto:tiziana.nardi@crea.gov.it),

**Supplementary Table S1.** Samples description and metadata

| Source | Region and grape variety | Management   | Season              | Weed and cover crop management                                               | Pest management - chemical                                                                                                                                                                   | Pest management - Sulphur    | Pest management - Copper-sulphate                    |
|--------|--------------------------|--------------|---------------------|------------------------------------------------------------------------------|----------------------------------------------------------------------------------------------------------------------------------------------------------------------------------------------|------------------------------|------------------------------------------------------|
| Bark   | Piedmont, Dolcetto       | Conventional | Veraison (June)     | inter row:<br>no cover crop<br>under row:<br>chemical weeding                | 2 x Glyphosate (March)<br>2 x dithiocarbamate (30 days before veraison)<br>2 x systemic pesticides - (Dimethomorph, penconazole, 30 days before veraison)<br>1 x Metalaxyl (before veraison) | 1 x 20 kg/ha<br>5 x 3 kg/ha  | 1 x Copper-sulphate (< 3kg Cu <sup>2+</sup> /ha tot) |
| Bark   | Piedmont, Dolcetto       | Conventional | Harvest (September) |                                                                              |                                                                                                                                                                                              |                              |                                                      |
| Grape  | Piedmont, Dolcetto       | Conventional | Harvest (September) |                                                                              |                                                                                                                                                                                              |                              |                                                      |
| Bark   | Piedmont, Dolcetto       | Biodynamic   | Veraison (June)     | inter row:<br>permanent cover<br>crop grassing-over<br>under row:<br>tillage | no                                                                                                                                                                                           | 1 x 20 kg/ha<br>10 x 3 kg/ha | Copper-sulphate (< 1,5kg Cu <sup>2+</sup> /ha tot)   |
| Bark   | Piedmont, Dolcetto       | Biodynamic   | Harvest (September) |                                                                              |                                                                                                                                                                                              |                              |                                                      |
| Grape  | Piedmont, Dolcetto       | Biodynamic   | Harvest (September) |                                                                              |                                                                                                                                                                                              |                              |                                                      |
| Bark   | Tuscany, Sangiovese      | Conventional | Veraison (June)     | inter row:<br>no cover crop<br>under row:<br>chemical weeding                | 1 x Glyphosate (March)<br>2 x dithiocarbamate (30 days before veraison)<br>2 x systemic pesticides - (Dimethomorph, penconazole, 30 days before veraison)<br>1 x Metalaxyl (before veraison) | 1 x 20 kg/ha<br>5 x 3 kg/ha  | 1 x Copper-sulphate (< 3kg Cu <sup>2+</sup> /ha tot) |
| Bark   | Tuscany, Sangiovese      | Conventional | Harvest (September) |                                                                              |                                                                                                                                                                                              |                              |                                                      |
| Grape  | Tuscany, Sangiovese      | Conventional | Harvest (September) |                                                                              |                                                                                                                                                                                              |                              |                                                      |
| Bark   | Tuscany, Sangiovese      | Biodynamic   | Veraison (June)     | inter row:<br>winter cover crop<br>grassing-over<br>under row:<br>tillage    | no                                                                                                                                                                                           | 1 x 20 kg/ha<br>10 x 3 kg/ha | Copper-sulphate (< 3kg Cu <sup>2+</sup> /ha tot)     |
| Bark   | Tuscany, Sangiovese      | Biodynamic   | Harvest (September) |                                                                              |                                                                                                                                                                                              |                              |                                                      |
| Grape  | Tuscany, Sangiovese      | Biodynamic   | Harvest (September) |                                                                              |                                                                                                                                                                                              |                              |                                                      |

**Supplementary Table S2.** PERMANOVA on whole dataset: Permutation test for Adonis under reduced model, Permutation: free, Number of permutations: 10000, Significance codes: 0 '\*\*\*' 0.001 '\*\*' 0.01 '\*' 0.05 '.' 0.1 ' ' 1

|                          | Df | SumOfSqs | R2     | F       | Pr(>F)   |     |
|--------------------------|----|----------|--------|---------|----------|-----|
| Source                   | 1  | 3,9677   | 0,4432 | 42,5904 | 1,00E-04 | *** |
| Season                   | 1  | 0,2661   | 0,0297 | 2,8568  | 0,026797 | *   |
| Region                   | 1  | 0,5229   | 0,0584 | 5,6127  | 0,0013   | **  |
| Management               | 1  | 0,3006   | 0,0336 | 3,2269  | 0,016598 | *   |
| Source:Region            | 1  | 0,3651   | 0,0408 | 3,9187  | 0,007699 | **  |
| Season:Region            | 1  | 0,2      | 0,0223 | 2,1471  | 0,067993 | .   |
| Source:Management        | 1  | 0,2391   | 0,0267 | 2,5664  | 0,035996 | *   |
| Season:Management        | 1  | 0,2631   | 0,0294 | 2,8239  | 0,027497 | *   |
| Region:Management        | 1  | 0,2129   | 0,0238 | 2,2858  | 0,058794 | .   |
| Source:Region:Management | 1  | 0,1972   | 0,022  | 2,1164  | 0,070293 | .   |
| Season:Region:Management | 1  | 0,1812   | 0,0202 | 1,9452  | 0,081792 | .   |
| Residual                 | 24 | 2,2358   | 0,2498 |         |          |     |
| Total                    | 35 | 8,9517   | 1      |         |          |     |
| ---                      |    |          |        |         |          |     |

**Supplementary Table S3.** PERMANOVA on bark dataset: Permutation test for Adonis under reduced model, Permutation: free, Number of permutations: 10000, Significance codes: 0 '\*\*\*\*' 0.001 '\*\*\*' 0.01 '\*' 0.05 '.' 0.1 ' ' 1

|                          | Df | SumOfSqs | R2     | F      | Pr(>F)   |      |
|--------------------------|----|----------|--------|--------|----------|------|
| Season                   | 1  | 0,2684   | 0,0696 | 2,5596 | 0,0044   | **   |
| Region                   | 1  | 0,7215   | 0,1872 | 6,8809 | 1,00E-04 | **** |
| Management               | 1  | 0,3155   | 0,0818 | 3,0086 | 0,0011   | **   |
| Season:Region            | 1  | 0,2003   | 0,0519 | 1,9099 | 0,027597 | *    |
| Season:Management        | 1  | 0,2633   | 0,0683 | 2,5108 | 0,005599 | **   |
| Region:Management        | 1  | 0,2256   | 0,0585 | 2,1511 | 0,012599 | *    |
| Season:Region:Management | 1  | 0,1831   | 0,0475 | 1,7464 | 0,040596 | *    |
| Residual                 | 16 | 1,6777   | 0,4352 |        |          |      |
| Total                    | 23 | 3,8552   | 1      |        |          |      |
| ---                      |    |          |        |        |          |      |

**Supplementary Table S4.** PERMANOVA on grape dataset: Permutation test for Adonis under reduced model, Permutation: free, Number of permutations: 10000, Significance codes: 0 '\*\*\*\*' 0.001 '\*\*\*' 0.01 '\*' 0.05 '.' 0.1 ' ' 1

|                   | Df | SumOfSqs | R2     | F      | Pr(>F)  |   |
|-------------------|----|----------|--------|--------|---------|---|
| Region            | 1  | 0,19581  | 0,1136 | 1,6891 | 0,15878 |   |
| Management        | 1  | 0,34695  | 0,2012 | 2,9928 | 0,0125  | * |
| Region:Management | 1  | 0,25426  | 0,1475 | 2,1933 | 0,07489 | . |
| Residual          | 8  | 0,92741  | 0,5378 |        |         |   |
| Total             | 11 | 1,72443  | 1      |        |         |   |
| ---               |    |          |        |        |         |   |

**Supplementary Table S5.** Differential Abundance Testing on bark dataset

|       | <b>Order</b>        | <b>Family</b>        | <b>Genus</b> | <b>we.eBH</b> | <b>rab.win.<br/>PIED</b> | <b>rab.win.<br/>TUSC</b> | <b>diff.btw</b> | <b>diff.win</b> | <b>effect</b> | <b>overlap</b> |
|-------|---------------------|----------------------|--------------|---------------|--------------------------|--------------------------|-----------------|-----------------|---------------|----------------|
| SV104 | o__Rhodospirillales | f__Acetobacteraceae  | g__          | 0.0153806     | 83.232.281               | -0.6673245               | -8.482.918      | 4.282.898       | -1.713.049    | 0.0794273      |
| SV210 | o__Caulobacterales  | f__Caulobacteraceae  | g__          | 0.0468839     | 72.472.368               | -0.7901546               | -7.371.347      | 4.889.769       | -1.357.300    | 0.1222368      |
| SV141 | o__Rhizobiales      | f__Hyphomicrobiaceae | g__Devosia   | 0.0365052     | 78.544.614               | -0.7085851               | -7.864.535      | 5.151.127       | -1.338.663    | 0.1171876      |
| SV155 | o__Actinomycetales  | f__Sporichthyaceae   | g__          | 0.0060275     | 76.668.002               | -0.4082511               | -7.929.791      | 3.270.738       | -2.351.805    | 0.0208342      |
| SV72  | o__Actinomycetales  | f__Nocardioideaceae  | g__          | 0.0373300     | 88.426.961               | -0.6628193               | -8.927.515      | 5.281.569       | -1.383.913    | 0.1157349      |
| SV30  | o__[Saprosirales]   | f__Chitinophagaceae  | g__          | 0.0228141     | -0.3729684               | 100.121.941              | 9.854.812       | 5.746.238       | 1.439.101     | 0.0884267      |

**Supplementary Figure S1.** Rarefaction curves

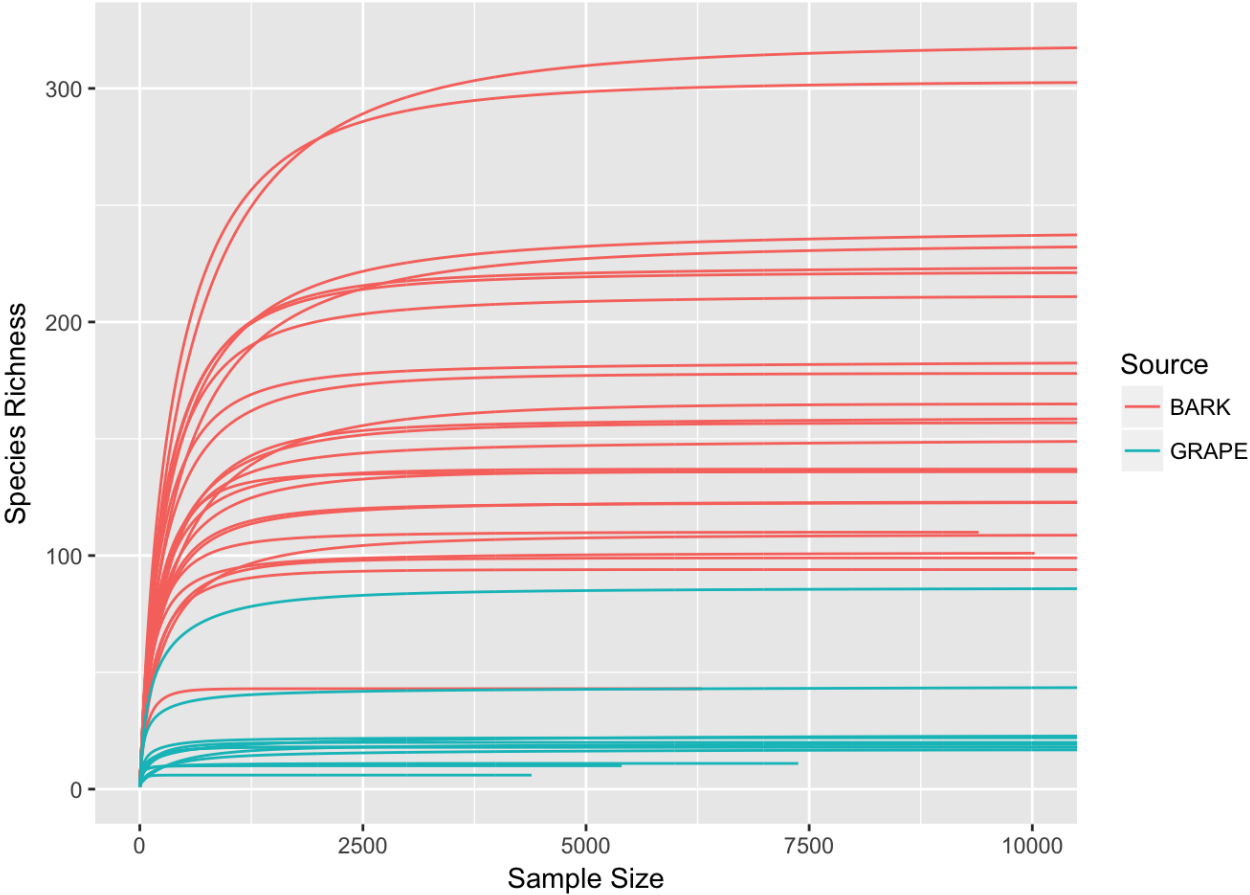

**Supplementary Figure S2. Relative abundance of bacterial epiphytes in bark and grape samples**

**A. Barcharts at phylum level**

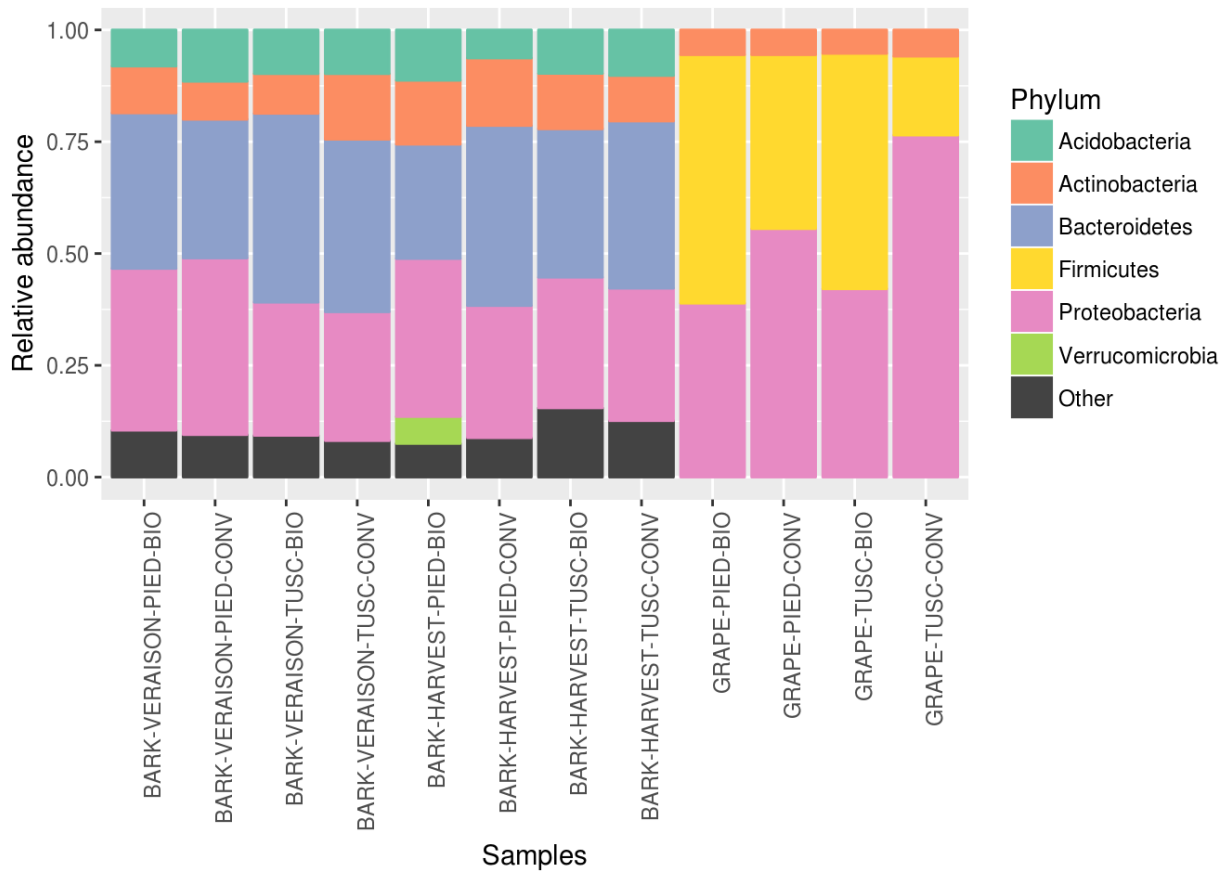

**B. Barcharts at class level**

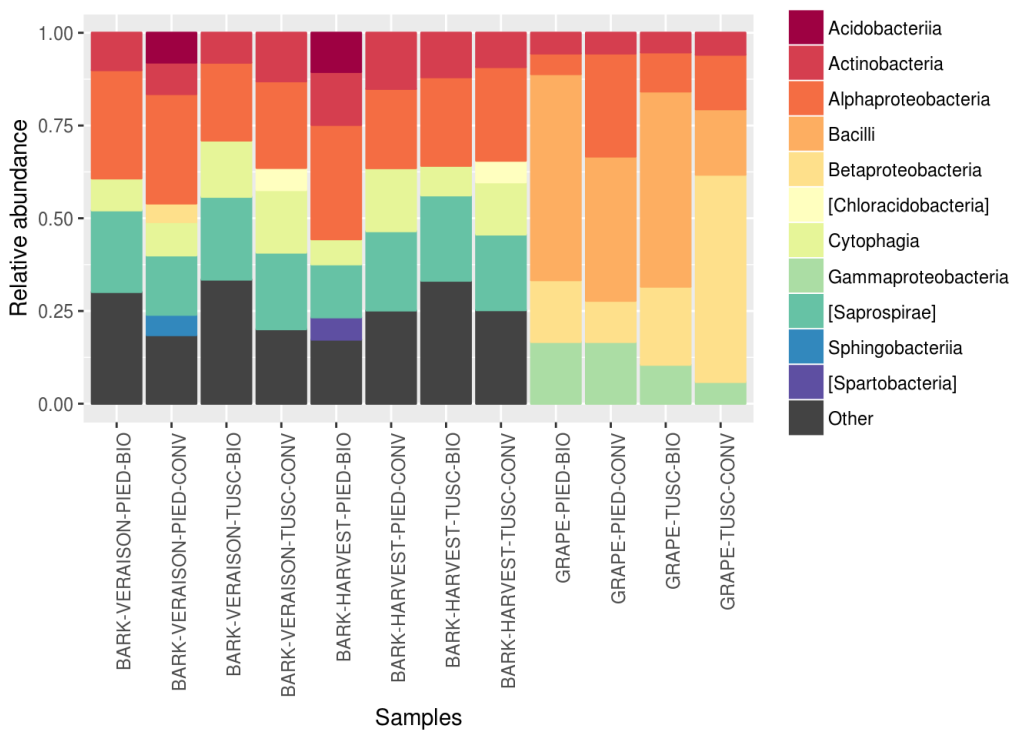

### Supplementary Figure S3. sPLS-DA on BARK data-set

A. Score plot on components 1 and 2

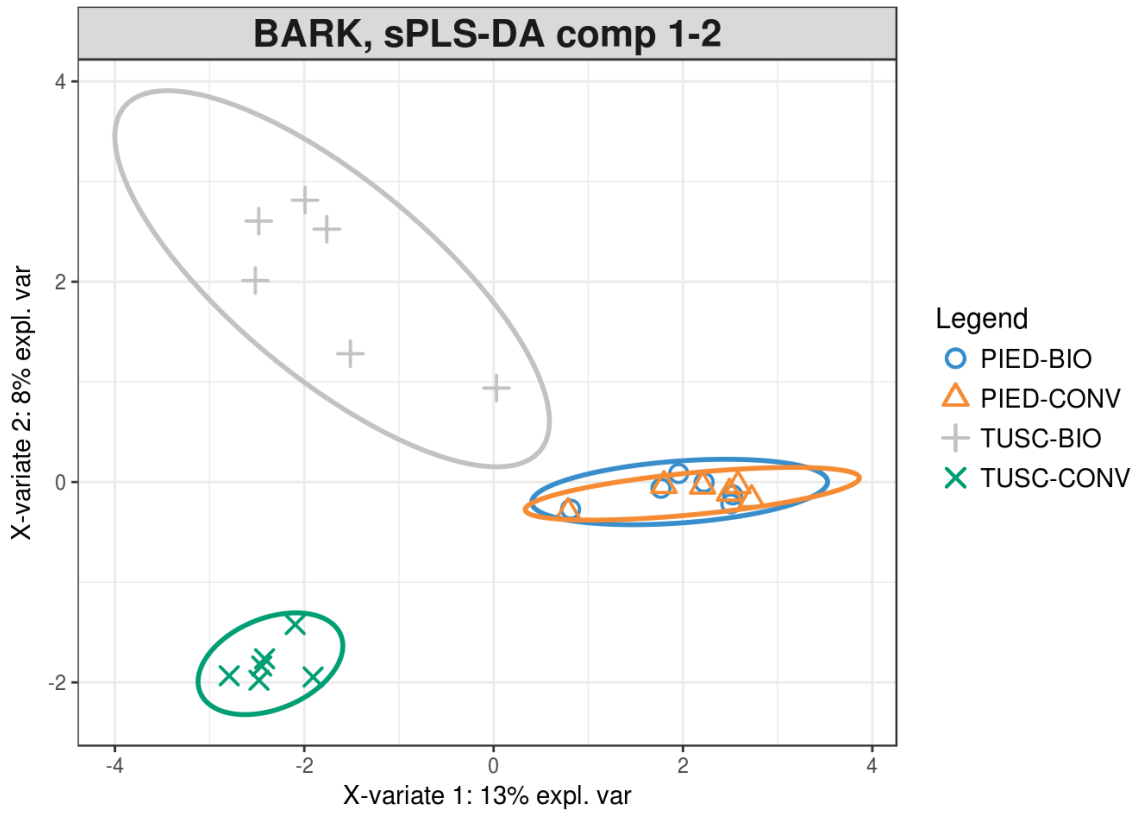

B. Score plot on components 2 and 3

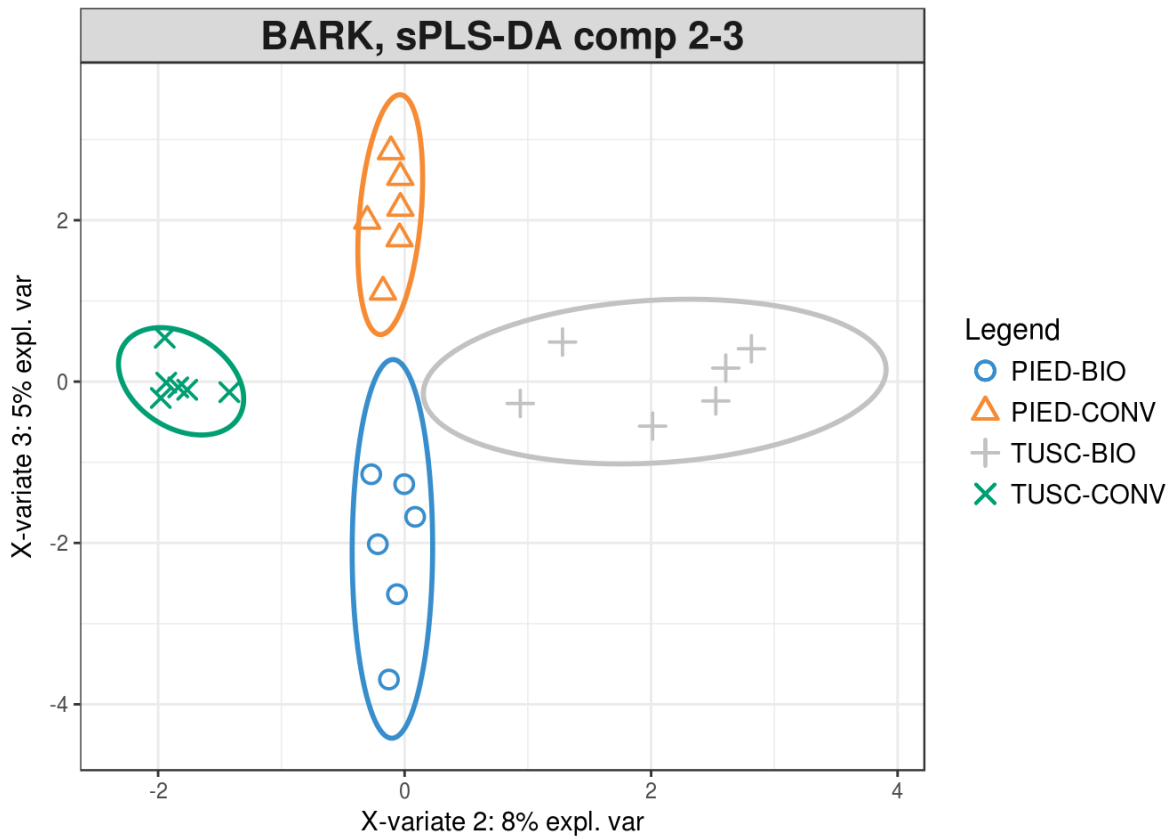



### C. Single entries contribution on component 1

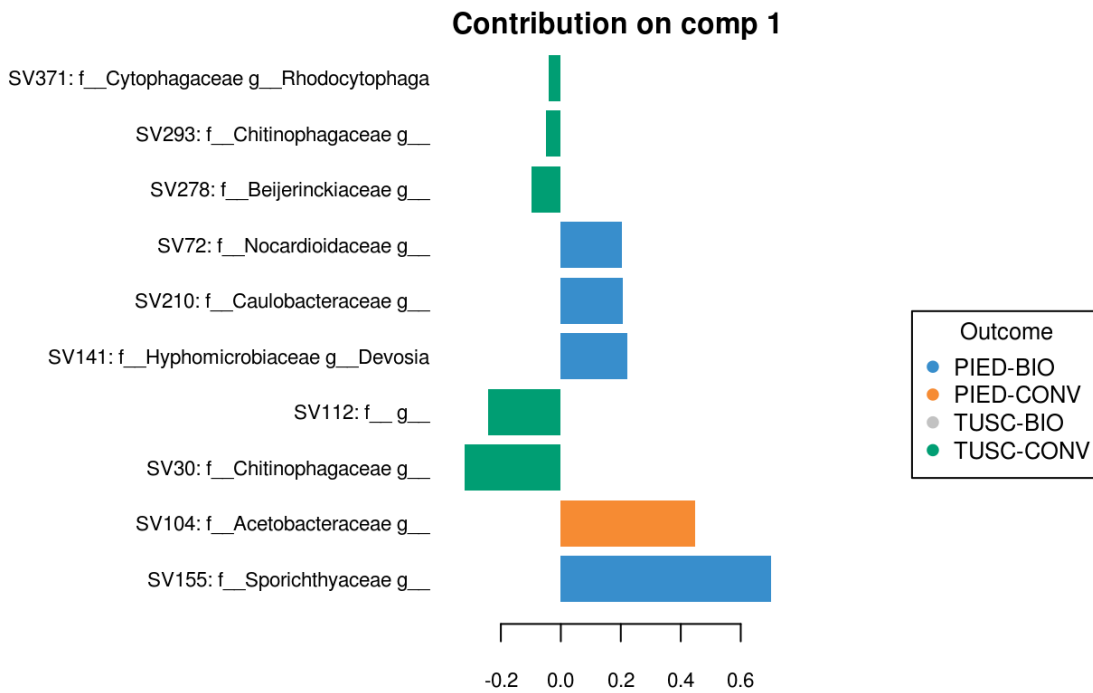

### D. Single entries contribution on component 2

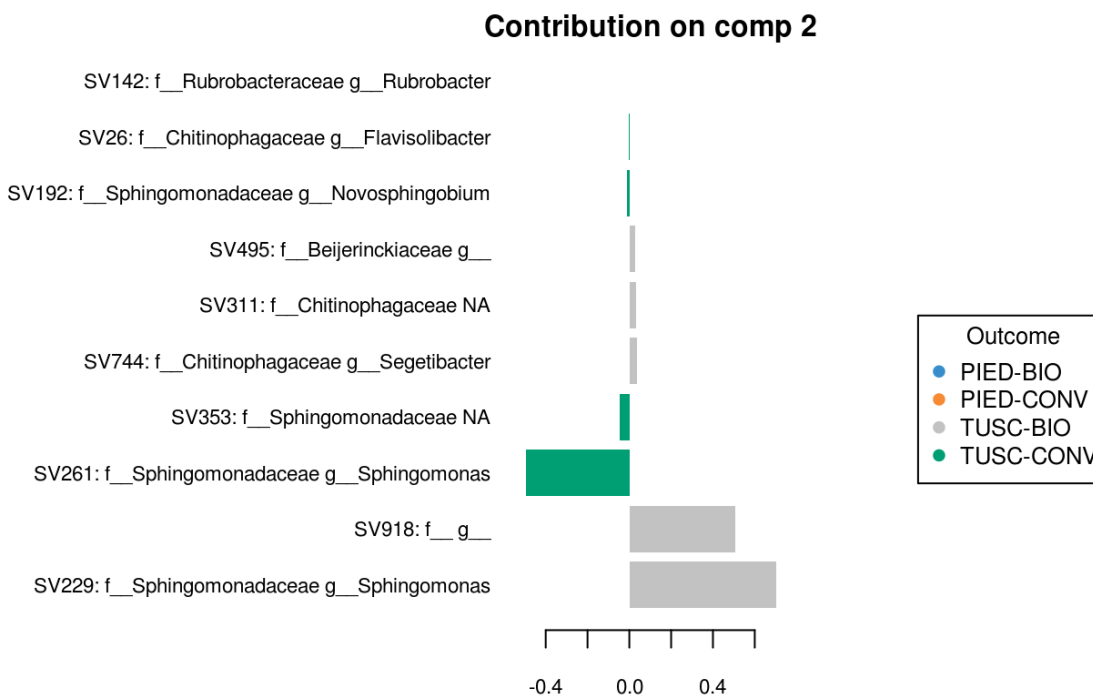

E. Single entries contribution on component 3

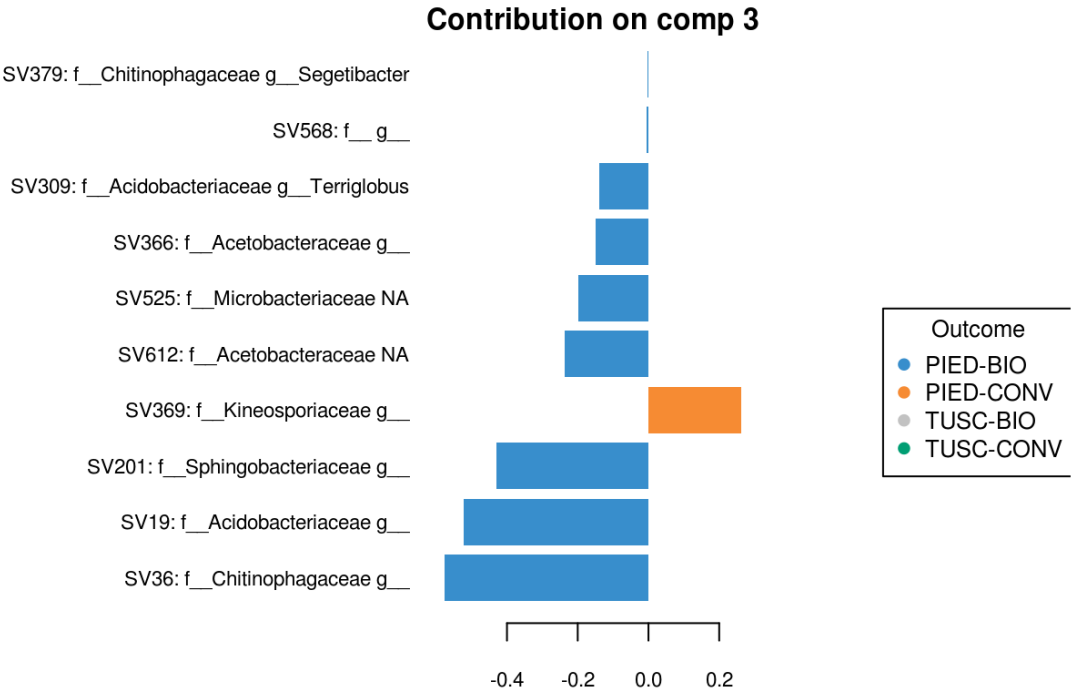

### Supplementary Figure S4. sPLS-DA on grape data-set

A. Score plot on components 1 and 2

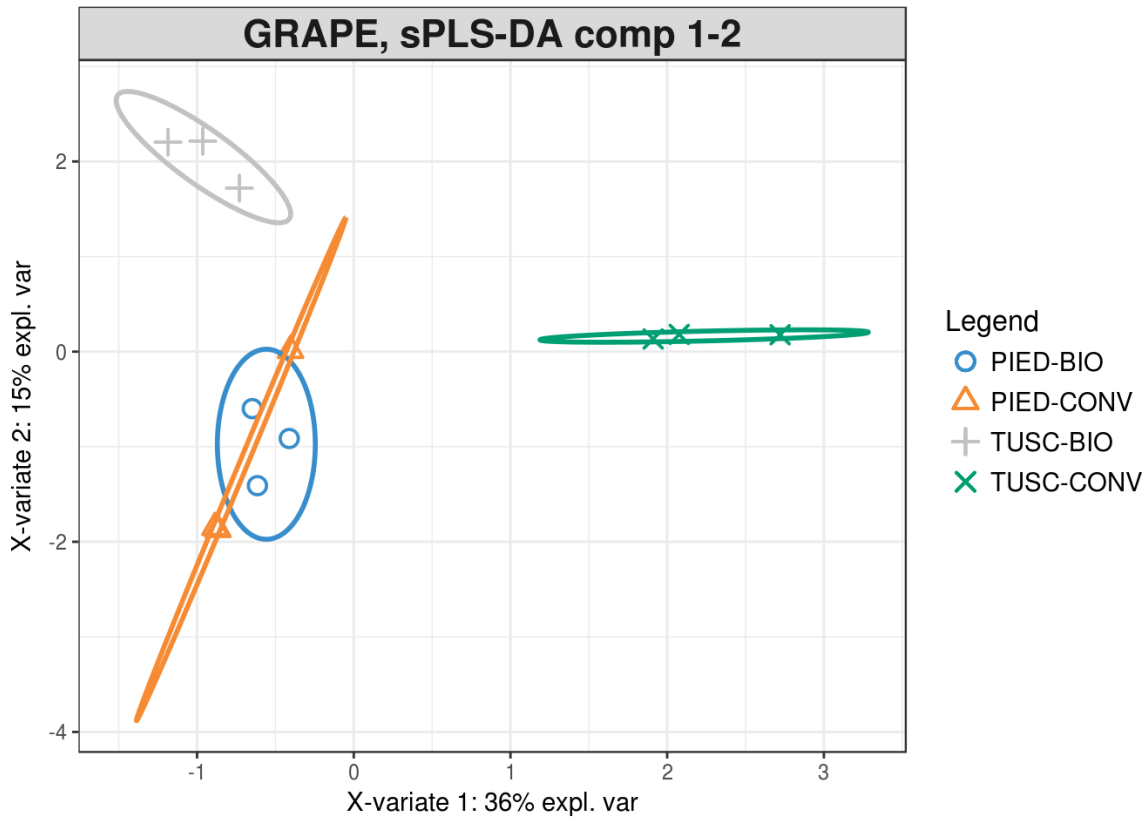

B. Score plot on components 2 and 3

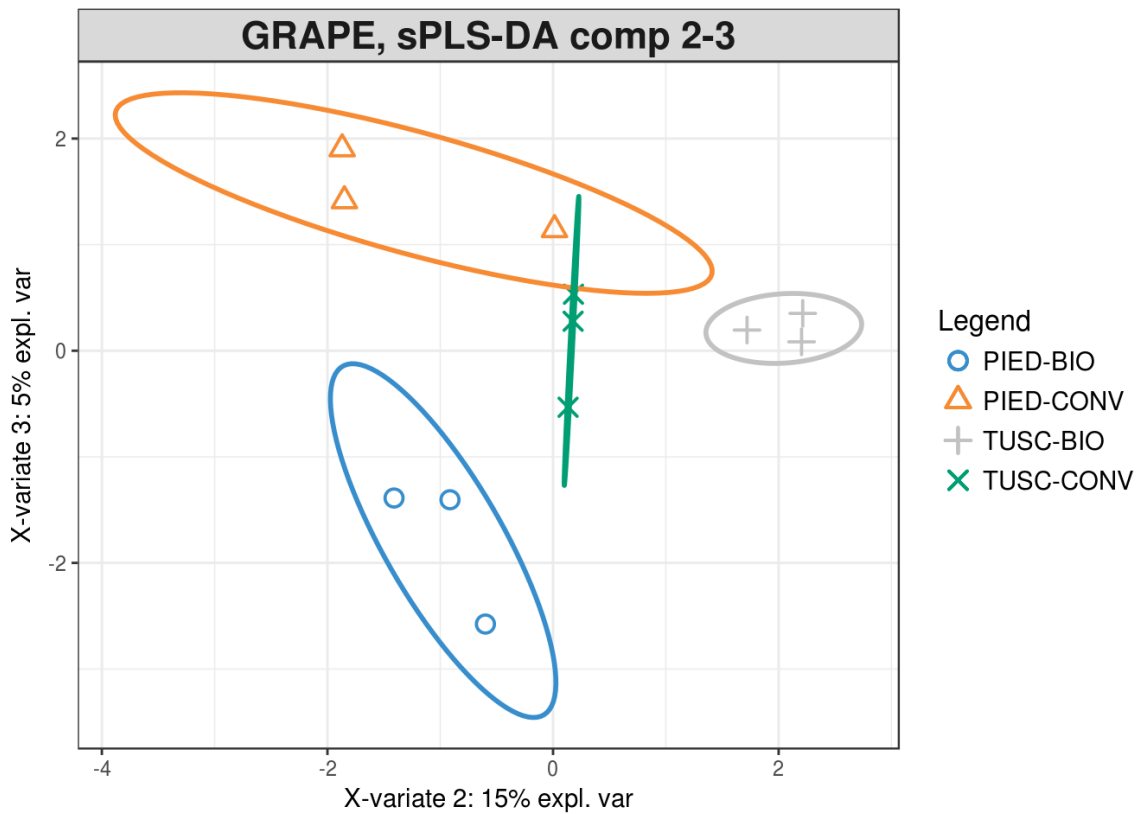

C. Single entries contribution on component 1

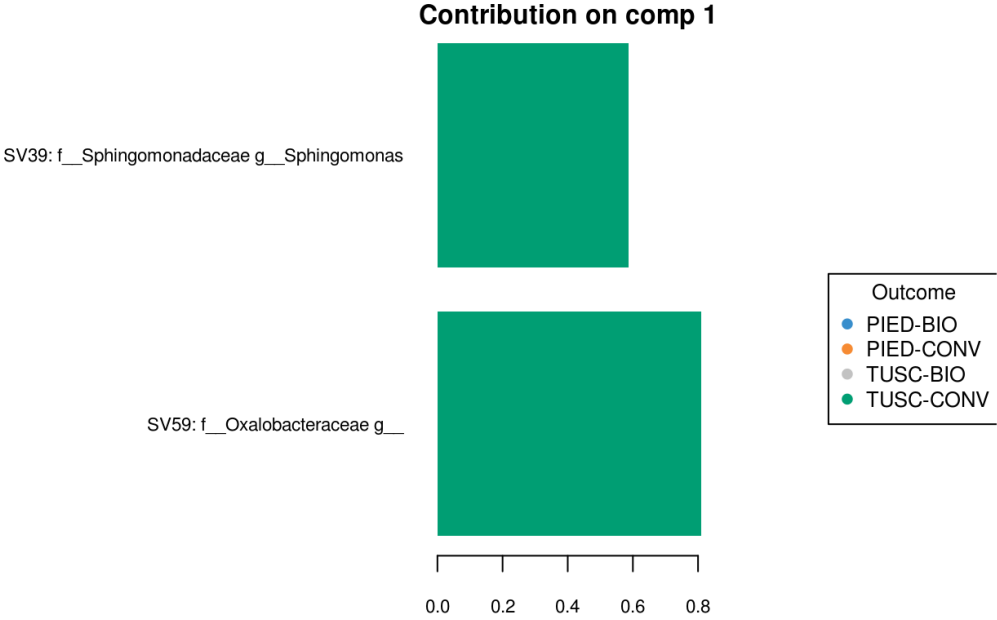

D. Single entries contribution on component 2

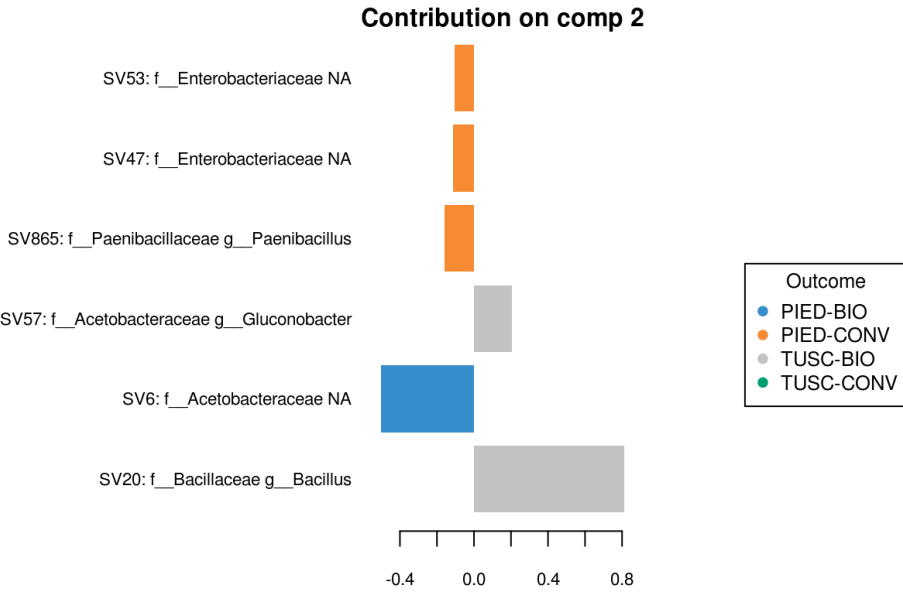

E. Single entries contribution on component 3

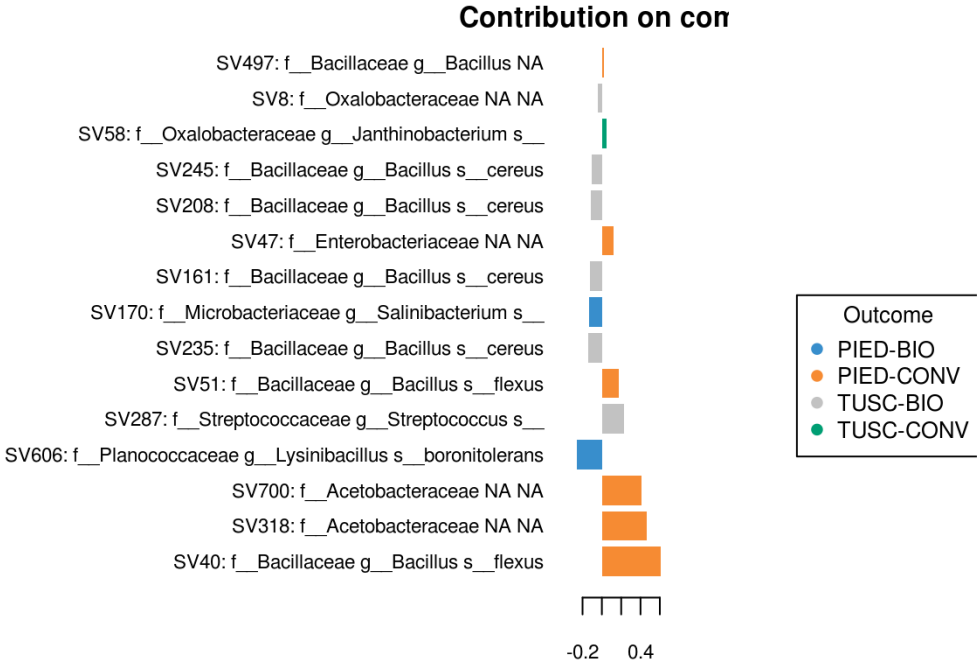

Supplement: Data_Sheet_1.pdf [file Data_Sheet_1.pdf]
